# Supplementary material for: β1 integrins are required for normal CNS myelination and promote AKT-dependent myelin outgrowth
Source: Oxford University Press journal article supplement (doi:10.1242/dev.038679), 2009-07-24
Supplement: dev038679tables1.pdf [file dev038679tables1.pdf]

**Table S1. Decreased g-ratios in CNS axons of *Itgb1-CNSko* and *Itgb1-OL-ko* mice**

| Fiber                             | Axon diameter ( $\mu\text{m}$ ) | G-ratio                 |                         | Mann-Whitney   |
|-----------------------------------|---------------------------------|-------------------------|-------------------------|----------------|
|                                   |                                 | WT (n)                  | MT (n)                  |                |
| Spinal cord                       | 0.6-0.7                         | 0.714 $\pm$ 0.005 (128) | 0.708 $\pm$ 0.008 (136) | $P=0.5533$     |
|                                   | 0.71-1.1                        | 0.741 $\pm$ 0.003 (488) | 0.754 $\pm$ 0.003 (519) | ** $P=0.0023$  |
|                                   | 1.11-2.5                        | 0.765 $\pm$ 0.002 (594) | 0.794 $\pm$ 0.002 (810) | *** $P=0.0001$ |
|                                   | >2.5                            | 0.787 $\pm$ 0.003 (278) | 0.818 $\pm$ 0.003 (313) | *** $P=0.0001$ |
| Optic nerves                      | 0.6-1.0                         | 0.756 $\pm$ 0.002 (579) | 0.758 $\pm$ 0.003 (483) | $P=0.5783$     |
|                                   | 1.1-1.5                         | 0.798 $\pm$ 0.002 (447) | 0.805 $\pm$ 0.003 (329) | * $P=0.0422$   |
|                                   | 1.51-2.0                        | 0.820 $\pm$ 0.003 (158) | 0.835 $\pm$ 0.004 (129) | ** $P=0.0017$  |
|                                   | >2.1                            | 0.828 $\pm$ 0.005 (49)  | 0.856 $\pm$ 0.004 (69)  | *** $P=0.0001$ |
| Cerebellum                        | 0.6-0.7                         | 0.717 $\pm$ 0.011 (33)  | 0.731 $\pm$ 0.019 (17)  | $P=0.4892$     |
|                                   | 0.71-1.2                        | 0.741 $\pm$ 0.006 (93)  | 0.758 $\pm$ 0.007 (88)  | $P=0.0584$     |
|                                   | >1.2                            | 0.763 $\pm$ 0.009 (30)  | 0.801 $\pm$ 0.054 (31)  | ** $P=0.005$   |
| Spinal cord<br>( <i>Ng2-Cre</i> ) | 0.6-0.7                         | 0.745 $\pm$ 0.007 (72)  | 0.768 $\pm$ 0.007 (33)  | $P=0.0532$     |
|                                   | 0.71-1.1                        | 0.759 $\pm$ 0.003 (290) | 0.785 $\pm$ 0.003 (173) | *** $P=0.0001$ |
|                                   | 1.11-2.5                        | 0.762 $\pm$ 0.003 (369) | 0.783 $\pm$ 0.003 (256) | *** $P=0.0001$ |
|                                   | >2.5                            | 0.793 $\pm$ 0.002 (206) | 0.799 $\pm$ 0.003 (129) | $P=0.1041$     |

G-ratio values for fibers grouped by axon diameter in spinal cords, optic nerves and cerebellum from *Itgb1* conditional knockout mice (MT) and WT littermates derived using nestin-*Cre*, and in mouse spinal cords derived using *Ng2-Cre*. Values are shown as mean $\pm$ s.e.m. The number of scored fibers in each group is also shown in parentheses. Statistical significance calculated using Mann-Whitney (rank sum) test is shown. In the spinal cords, optic nerves and cerebellum of mutant mice derived using nestin-*Cre* there was a significant increase in the g-ratio in the larger caliber fibers (spinal cords, cerebellum:  $n=3$  WT and  $n=3$  *Itgb1-CNSko* animals; optic nerves:  $n=2$  WT and  $n=2$  *Itgb1-CNSko* animals). In the spinal cords of mutant mice derived using *Ng2-Cre* there was a significant increase in the g-ratio in the majority of fibers (429 out of 591) with axons between 0.71 and 2.5  $\mu\text{m}$  in diameter (spinal cords *Ng2-Cre*:  $n=2$  WT and  $n=2$  *Itgb1-OL-ko* animals).
